# Supplementary material
Source: publisher site journal article supplement (https://www.dovepress.com/article/512671)
Supplement: Supplementary file 1 [file get_supplementary_file.php]

**Supplementary Table 1** Ocular comorbidities

| Active ocular surface disease (OSD) | Previous keratitis | Previous surgery |
| --- | --- | --- |
| Active viral keratitis | Infectious keratitis | Any corneal transplant |
| Conjunctivitis | Marginal keratitis | Other ocular surgery <3 months |
| Corneal anaesthesia |  |  |
| Corneal decompensation |  |  |
| External disease: acne rosacea |  |  |
| External disease: atopy |  |  |
| External disease: ectropion |  |  |
| External disease: entropion |  |  |
| External disease: floppy eye lid syndrome |  |  |
| External disease: immune OSD |  |  |
| External disease: lagophthalmos |  |  |
| External disease: toxic OSD (e.g. drop related) |  |  |
| External disease: trichiasis |  |  |
| Loose corneal sutures |  |  |
| Thyroid eye disease |  |  |

**Supplementary Table 2** Pre-COVID and post-COVID within-group analyses

|  | 2018 (n = 79) | 2019 (n = 69) | P-value | 2022  (n = 60) | 2023  (n = 52) | P-value |
| --- | --- | --- | --- | --- | --- | --- |
| Age at presentation in years, median (IQR) | 42 (26-56) | 42 (30-58) | 0.457 | 43 (30-60) | 46 (32.5-60) | 0.638 |
| Female sex, n (%) | 43 (54) | 46 (67) | 0.135 | 34 (57) | 33 (64) | 0.563 |
| Method of referral, n (%)   - General practitioner or optometrist - Peripheral ophthalmologist - Known REH patient - Other   - Self-referral   - Non-ophthalmological specialist   *Missing, n* | 49 (62)  18 (23) 8 (10) 3 (4)  2 (3)  1 (1)  *1 (1)* | 39 (57)  22 (32) 7 (10) 0 (0)  *1 (1)* | 0.322 | 31 (52)  20 (33) 9 (15) 0 (0) | 31 (60)  14 (27)  7 (14)  0 (0) | 0.699 |
| Distance home-REH in kilometres,  median (IQR)  *Missing (n)* | 8.4  (3.7-17.7)  *1 (1)* | 7.6  (2.8-16.5) | 0.702 | 11.5  (4.6-20.2)  *1 (2)* | 6.7  (4.0-17.5)  *1 (2)* | 0.147 |
| Presentation delay of ≥4 days, n (%)  *Not applicable, n*  *Missing, n* | 36 (46)  *3 (4) 2 (3)* | 39 (57)  *2 (3)*  *1 (1)* | 0.238 | 28 (47)  *2 (3)* | 30 (58) | 0.345 |
| Systemic condition, n (%)   - Diabetes mellitus - Rheumatoid arthritis - Systemic immune suppression (including for rheumatoid arthritis) | 6 (8) 1 (1)  3 (4) | 4 (6) 1 (1)  1 (1) | 0.751  1.000  0.623 | 4 (7) 1 (2)  2 (3) | 4 (8)  2 (4)  3 (6) | 1.000 0.596  0.662 |
| Active ocular surface disease, n (%) | 17 (22) | 10 (15) | 0.294 | 13 (22) | 3 (6) | **0.028** |
| Previous keratitis, n (%) | 10 (13) | 8 (12) | 1.000 | 16 (27) | 8 (15) | 0.171 |
| Previous surgery, n (%) | 9 (11) | 6 (9) | 0.786 | 4 (7) | 4 (8) | 1.000 |
| Associated trauma, n (%) | 11 (14) | 9 (13) | 1.000 | 2 (3) | 10 (19) | **0.012** |
| Contact lens wear, n (%) | 53 (67) | 50 (73) | 0.591 | 44 (73) | 35 (67) | 0.537 |
| Visual acuity at presentation ≤0.25 Snellen decimals, n (%)  *Impossible to determine, n*  *Not determined, n* | 25 (32)  *0 (0)*  *5 (6)* | 31 (45)  *1 (1)*  *1 (1)* | 0.168­ | 31 (52)  *1 (2)*  *2 (3)* | 22 (42)  *2 (4)* | 0.335 |
| Bilateral keratitis, n (%) | 3 (4) | 1 (1) | 0.623 | 1 (2) | 2 (4) | 0.596 |
| Microbiological diagnostics performed, n (%) | 61 (77) | 54 (78) | 1.000 | 46 (77) | 35 (67) | 0.296 |
| Hospital admissions, n (%)   - Actual - Indication | 22 (28)  22 (28) | 13 (19) 19 (28) | 0.246 1.000 | 16 (27) 21 (35) | 7 (14)  10 (19) | 0.103  0.090 |

**Note:** P-values <0.05 are highlighted in bold.

**Abbreviations:** CL, contact lens; IQR, interquartile range, REH, Rotterdam Eye Hospital.
